# Supplementary material for: A facile method for determining the Fe(0) content and reactivity of zero valent iron
Source: Royal Society of Chemistry journal article supplement (doi:10.1039/c5ay02182k), 2015-11-23
Supplement: c5ay02182k1.pdf [file c5ay02182k1.pdf]

## Supporting Information

### **A facile method for determining Fe(0) content and reactivity of zero valent iron**

*Shaolin Li\*, Yangyang Ding, Wei Wang, Hong Lei*

State Key Laboratory for Pollution Control  
School of Environmental Science and Engineering  
Tongji University  
Shanghai, 200092, China

---

\*Corresponding author; Email: [lishaolin@tongji.edu.cn](mailto:lishaolin@tongji.edu.cn); Fax: 86-21-65985885.

## Figure captions

Figure S1 XRD of ZVIs studied in this work.

Figure S2 Measured Fe(0) content of two ZVI mixtures. Results from replicate tests were presented.

Figure S3 Method validations.

- (a) Validations of measured Fe(0) content using Cu(II) solution (1.0 g-Cu(II)/L, ZVI dosage: 0.50 g/L); XRDs of solid products after reaction with Cu(II);
- (b) Validation of ZVI reactivity with TCE-degradation experiments ( $C_{0\text{TCE}}$ : 50 mg/L, ZVI dosage: 0.50 g/L); reaction kinetics of TCE degradation using seven different ZVIs.

Figure S4 Determination of Fe(0) content and reactivity of aged ZVIs. ZVIs: Row E, U-X, Table 1.

- (a) Reaction of aged ZVIs in Fe(III) solution. Fe(III) concentration ( $C_0$ ): 2.00 g-Fe(III)/L; ZVI dosage: 0.50 g/L;
- (b) Measured Fe(0) content and reactivity as a function of aging time.

Figure S1

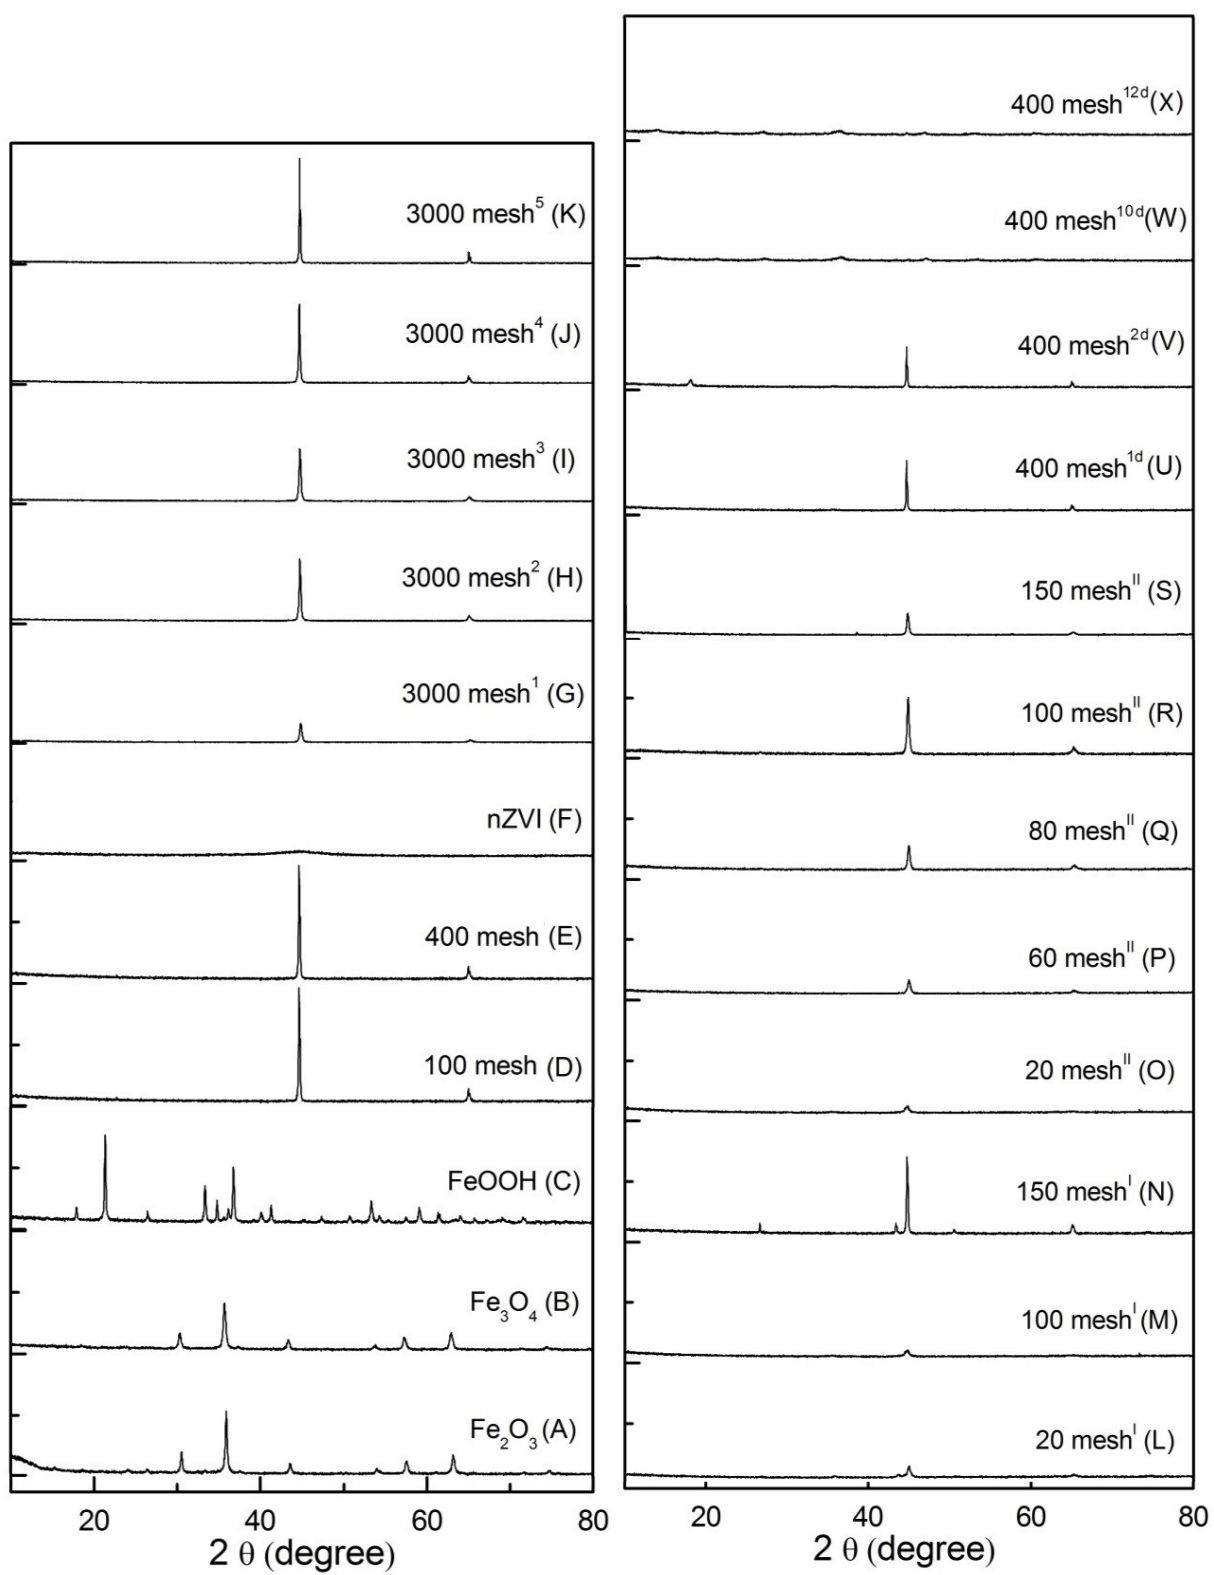

Figure S2

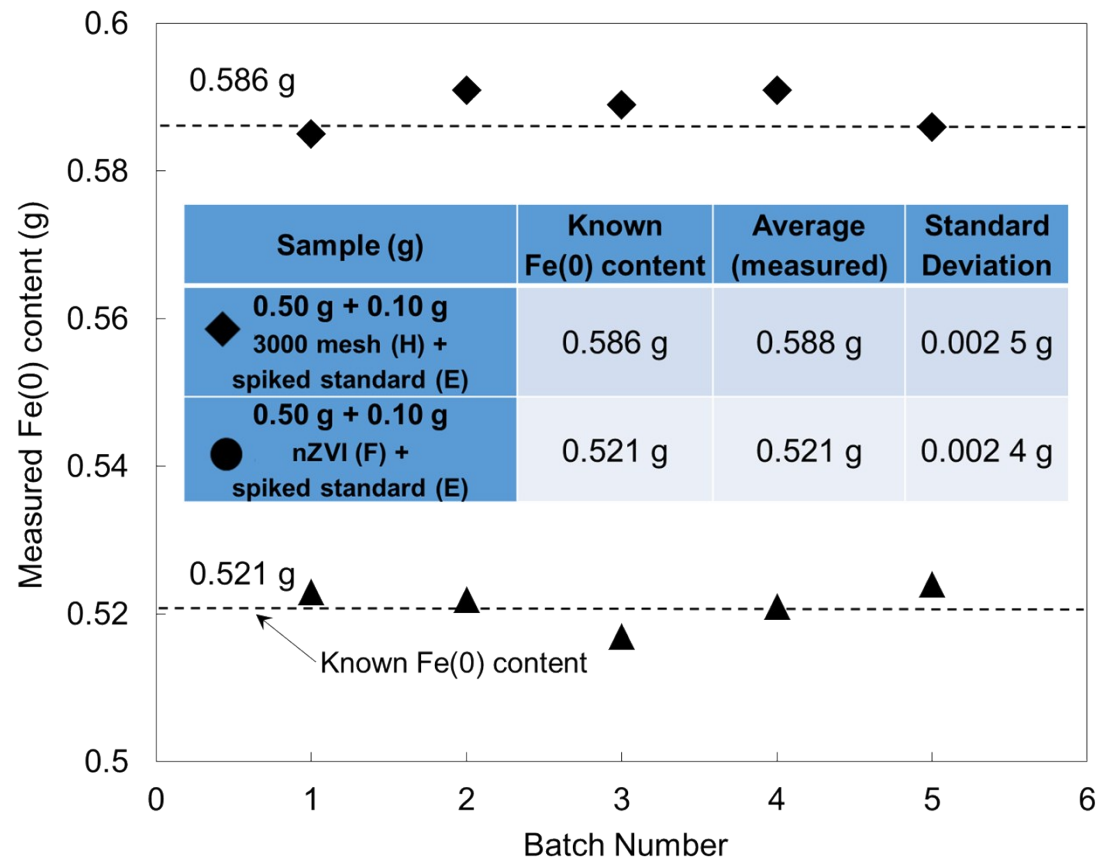

Figure S3

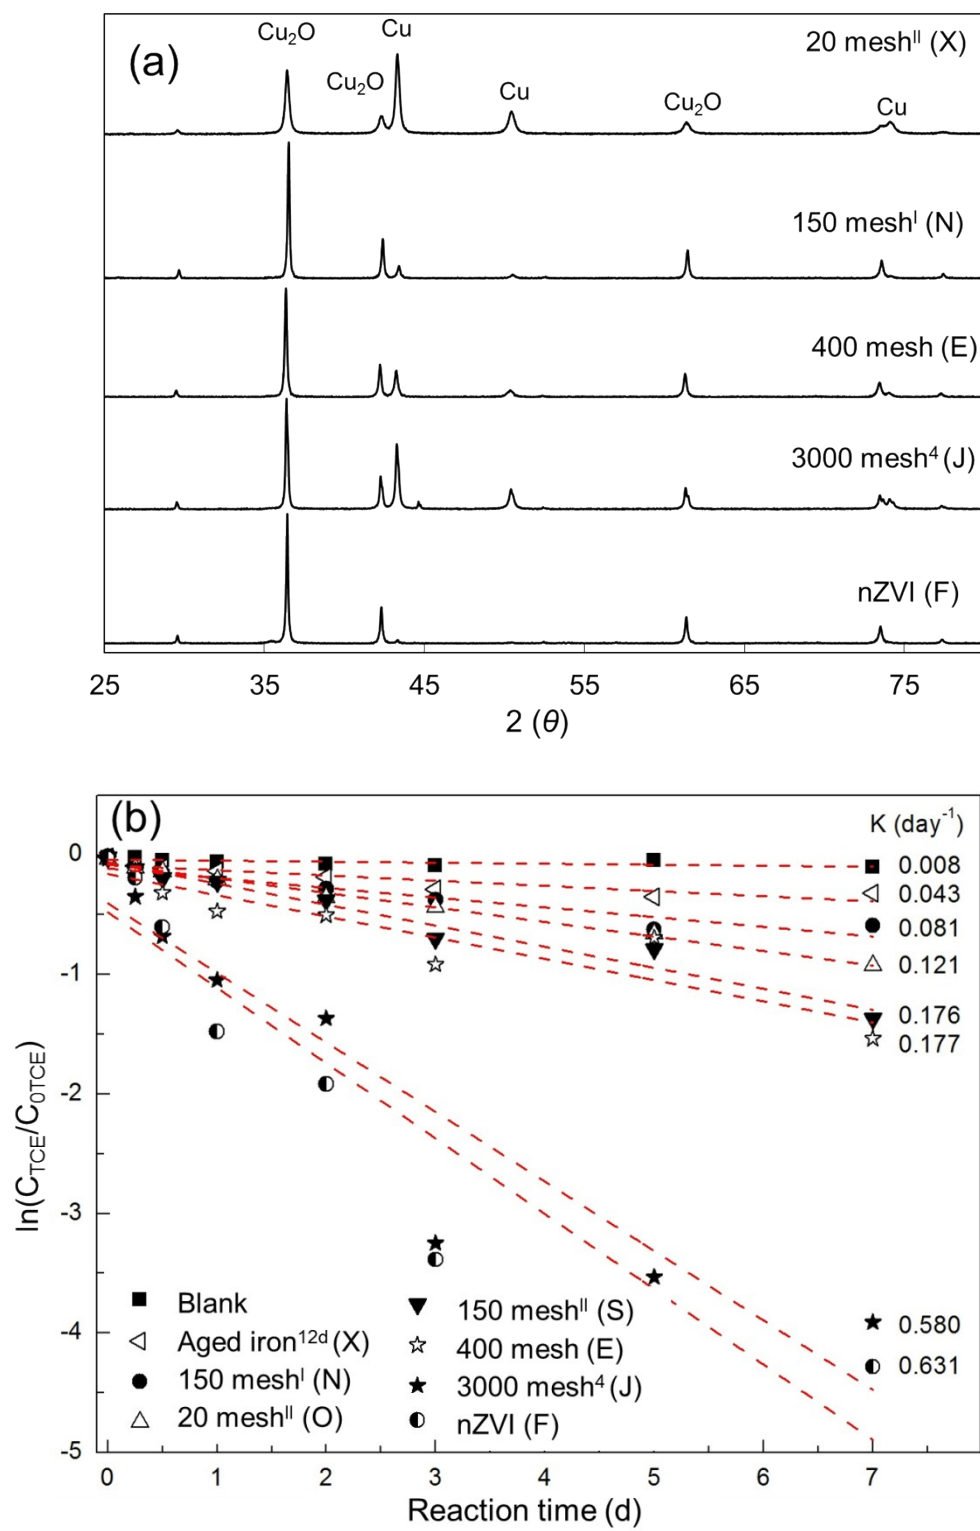

Figure S4

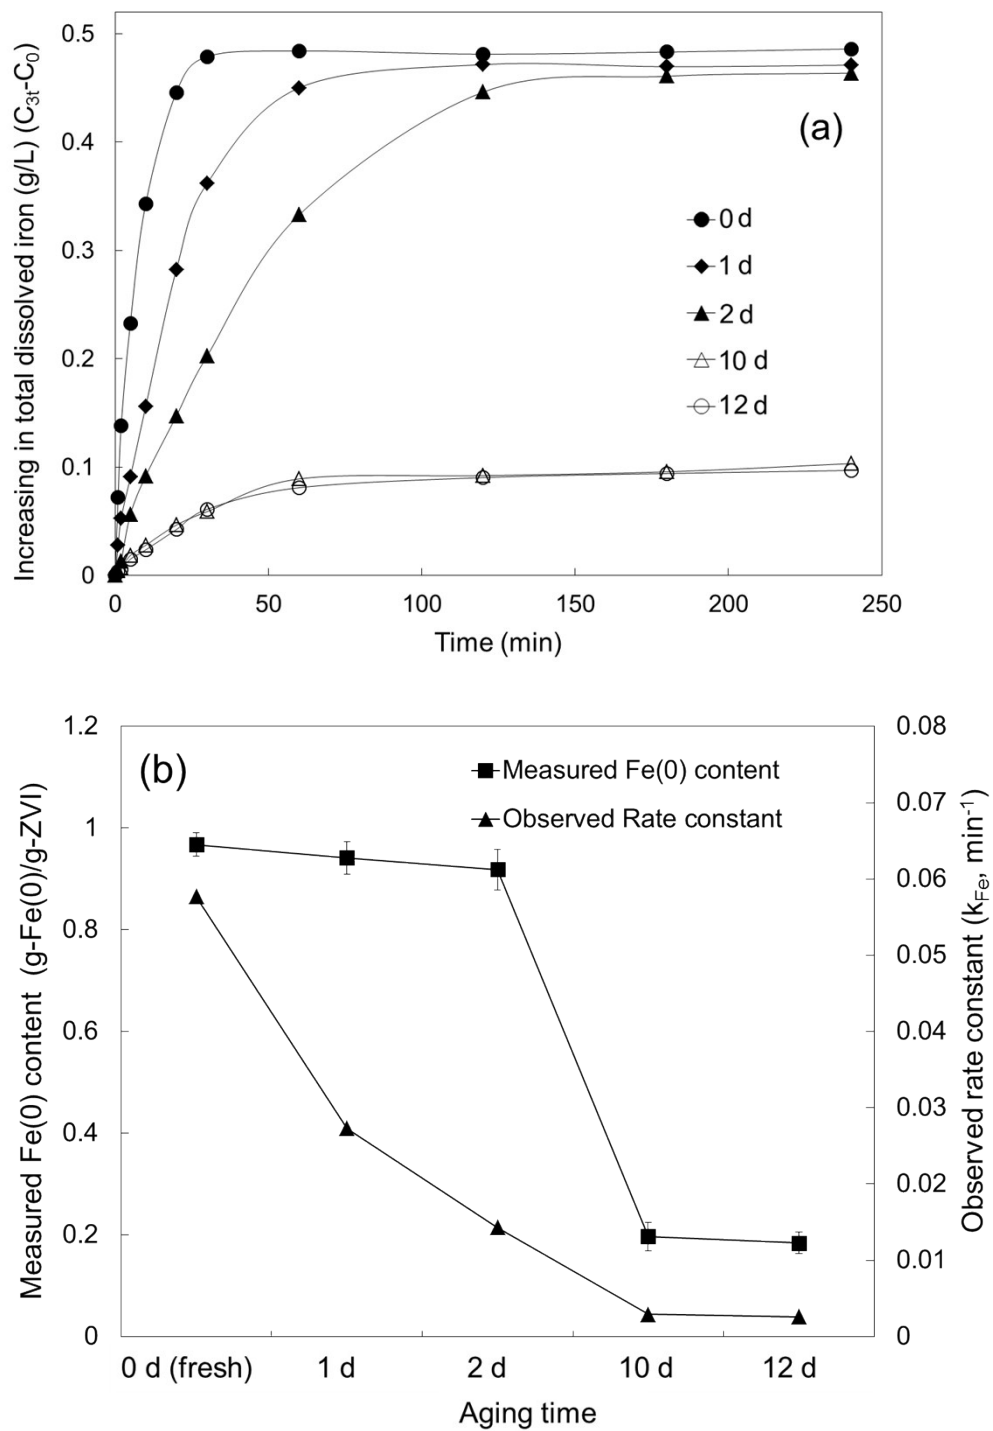

## Demonstration experiments using aged ZVIs

The aging or corrosion of iron material is almost inevitable due to the pervasive  $O_2$  and moisture. This process could be significant in large-scale application of ZVI, in which ZVI may experience long-term aging during storage or shipping. Such aging process may go unnoticed because the change in physical appearance is minor. A quick, simple and reliable method is required for assessing the quality of ZVI after long-term storage, especially in large-scale application where hundreds iron sample needs to be analyzed.

Four aged ZVI samples were measured using the Fe(III) method to exemplify this possible application. The samples were prepared by mixing high-purity ZVI (Row E, Table 1) with water. Results suggest that both Fe(0) content and reactivity of ZVI lose gradually during aging (Figure S4a and S4b). More importantly, the method provides quantitative results in assessing the impact of aging on ZVI quality. For example, minor changes (~3%) in Fe(0) content was observed in the first few days of aging; the Fe(0) content and reactivity after 12-d aging were only 20% and 5% of the fresh ZVI. Such quantitative results or minor change could not be obtained using SEM, XRD or BET- $N_2$ . XRDs and SEM images of aged ZVI (Figure 1 and S1) are quite similar. BET- $N_2$  adsorption even suggests the growth of their specific surface area (Table 1) during aging, which could be quite misleading in the judgment of their reactivity.
